# Supplementary material
Source: publisher site journal article supplement (https://www.dovepress.com/article/supplementary_file/573379/Supplementary%20Materials.docx)
Supplement: Supplementary file 1 [file Supplementary%20Materials.docx]

**Supplementary Materials**

**„Adaptation of MALDI TOF-MS technique for tracking changes in the urinary microbiome during and after radiotherapy for prostate cancer”**

**SM1**

**Table 1.** Patient characteristics.

| **Patient Characteristics** | **N / %** |
| --- | --- |
| Age median 69 (range 50-88) |  |
| Clinical stage |  |
| T1a-T1c | 36 / 41.91% |
| T2a-T2c | 40 / 45.45% |
| T3-T4 | 12 / 13.64% |
| PSA |  |
| <10 | 42 / 47.73% |
| 10–20 | 25 / 28.41% |
| >20 | 19 / 21.59% |
| No data | 2 / 2.27% |
| Gleason score |  |
| 6 | 34 / 38.64% |
| 7 (3 + 4) | 16 / 18.18% |
| 7 (4 + 3) | 16 / 18.18% |
| 8 | 16 / 18.18% |
| 9–10 | 6 / 6.82% |
| Use of androgen deprivation therapy |  |
| Yes | 67 / 76.14% |
| No | 21 / 23.86% |
| Treatment |  |
| Fractionated Linear accelerator  SBRT Linear accelerator | 45 / 51.14%  4 / 4.45% |
| SBRT Cyberknife | 39 / 44.32% |
| Irradiated volume  Prostate alone | 51 / 57.95% |
| Prostate bed + pelvic lymph nodes | 1 / 1.14% |
| Prostate + pelvic lymph nodes | 36 / 40.91% |

**SM2**

**Table 2.** Number of identified microbial genera per time point§ in each studied sample.

| **Patient ID** | **t1** | **t2** | **t3** | **t4** | **t5** | **t6** |
| --- | --- | --- | --- | --- | --- | --- |
| *09* | 1 | 4 | 0 | 1 | 2 | 2 |
| *12* | 0 | 4 | 1 | 3 | 6 | 0 |
| *14* | 3 | 0 | 2 | 1 | 3 | 6 |
| *16* | 6 | 3 | 4 | 2 | 0 | 3 |
| *17* | 1 | 1 | 0 | 0 | 1 | 2 |
| *19* | 2 | 0 | 1 | 2 | 1 | 0 |
| *22* | 3 | 5 | 3 | 6 | 0 | 0 |
| *26* | 0 | 0 | 1 | 1 | 2 | 1 |
| *28* | 0 | 0 | 2 | 4 | 6 | 5 |
| *29* | 4 | 4 | 3 | 5 | 4 | 4 |
| *30* | 4 | 2 | 2 | 5 | 5 | 5 |
| *32* | 2 | 0 | 1 | 0 | 4 | 2 |
| *34* | 3 | 2 | 2 | 1 | 5 | 3 |
| *35* | 5 | 9 | 6 | 3 | 8 | 6 |
| *36* | 1 | 5 | 2 | 5 | 6 | 2 |
| *37* | 2 | 1 | 0 | 2 | 6 | 3 |
| *39* | 2 | 0 | 1 | 1 | 2 | 1 |
| *41* | 1 | 1 | 0 | 6 | 2 | 3 |
| *42* | 1 | 1 | 1 | 2 | 1 | 1 |
| *43* | 4 | 3 | 4 | 1 | 1 | 7 |
| *44* | 2 | 2 | 3 | 1 | 1 | 6 |
| *47* | 3 | 1 | 1 | 0 | 3 | 1 |
| *48* | 1 | 8 | 3 | 9 | 6 | 5 |
| *49* | 5 | 5 | 4 | 5 | 2 | 3 |
| *50* | 1 | 6 | 6 | 6 | 6 | 4 |
| *52* | 6 | 0 | 2 | 1 | 7 | 7 |
| *53* | 6 | 6 | 6 | 5 | 9 | 5 |
| *55* | 4 | 4 | 1 | 3 | 1 | 4 |
| *56* | 0 | 0 | 0 | 2 | 1 | 0 |
| *57* | 0 | 5 | 7 | 5 | 2 | 6 |
| *58* | 5 | 0 | 3 | 2 | 3 | 6 |
| *59* | 1 | 2 | 1 | 1 | 4 | 2 |
| *63* | 4 | 2 | 1 | 3 | 2 | 2 |
| *64* | 4 | 5 | 4 | 0 | 2 | 4 |
| *65* | 1 | 1 | 2 | 1 | 2 | 4 |
| *70* | 0 | 3 | 3 | 4 | 0 | 1 |
| *71* | 3 | 8 | 2 | 5 | 4 | 4 |
| *72* | 3 | 2 | 9 | 2 | 1 | 0 |
| *73* | 3 | 0 | 0 | 2 | 0 | 3 |
| *74* | 1 | 4 | 3 | 5 | 6 | 0 |
| *75* | 2 | 1 | 7 | 4 | 1 | 5 |
| *77* | 1 | 7 | 2 | 3 | 5 | 5 |
| *78* | 1 | 2 | 0 | 5 | 2 | 6 |
| *79* | 6 | 5 | 4 | 0 | 7 | 2 |
| *81* | 1 | 2 | 4 | 6 | 5 | 9 |
| *82* | 4 | 0 | 5 | 2 | 1 | 3 |
| *83* | 5 | 3 | 3 | 4 | 7 | 6 |
| *84* | 1 | 1 | 1 | 1 | 4 | 0 |
| *85* | 7 | 0 | 9 | 6 | 5 | 5 |
| *87* | 5 | 1 | 3 | 5 | 4 | 3 |
| *88* | 3 | 1 | 1 | 1 | 0 | 1 |
| *89* | 0 | 2 | 6 | 2 | 2 | 8 |
| *90* | 1 | 3 | 3 | 0 | 1 | 7 |
| *91* | 0 | 1 | 2 | 1 | 3 | 1 |
| *93* | 3 | 6 | 6 | 2 | 9 | 6 |
| *94* | 2 | 7 | 3 | 3 | 4 | 5 |
| *95* | 6 | 6 | 2 | 4 | 5 | 1 |
| *96* | 2 | 2 | 5 | 5 | 12 | 4 |
| *97* | 4 | 6 | 1 | 4 | 3 | 1 |
| *99* | 1 | 2 | 6 | 6 | 3 | 4 |
| *101* | 1 | 3 | 0 | 4 | 3 | 0 |
| *106* | 1 | 4 | 2 | 4 | 2 | 10 |
| *107* | 1 | 2 | 0 | 2 | 3 | 2 |
| *109* | 6 | 3 | 6 | 5 | 4 | 6 |
| *110* | 2 | 5 | 2 | 1 | 0 | 1 |
| *117* | 5 | 6 | 1 | 9 | 8 | 7 |
| *118* | 3 | 1 | 5 | 4 | 3 | 4 |
| *121* | 6 | 5 | 8 | 3 | 9 | 10 |
| *125* | 11 | 9 | 4 | 13 | 8 | 12 |
| *126* | 5 | 4 | 2 | 2 | 3 | 6 |
| *129* | 0 | 4 | 4 | 7 | 1 | 4 |
| *130* | 0 | 7 | 2 | 5 | 1 | 4 |
| *131* | 3 | 6 | 6 | 5 | 11 | 5 |
| *133* | 6 | 2 | 3 | 5 | 8 | 4 |
| *137* | 9 | 1 | 0 | 0 | 3 | 0 |
| *138* | 8 | 6 | 2 | 5 | 7 | 8 |
| *140* | 1 | 6 | 7 | 5 | 9 | 5 |
| *141* | 5 | 2 | 6 | 6 | 7 | 9 |
| *142* | 8 | 2 | 4 | 1 | 5 | 7 |
| *148* | 0 | 4 | 1 | 2 | 5 | 0 |
| *149* | 2 | 3 | 3 | 0 | 5 | 1 |
| *151* | 1 | 1 | 2 | 1 | 2 | 5 |
| *154* | 1 | 0 | 6 | 4 | 4 | 1 |
| *161* | 1 | 6 | 4 | 3 | 1 | 1 |
| *163* | 2 | 2 | 2 | 3 | 1 | 2 |
| *167* | 8 | 4 | 4 | 4 | 7 | 1 |
| *169* | 4 | 3 | 7 | 2 | 9 | 2 |
| *174* | 6 | 8 | 6 | 8 | 10 | 8 |
| *Average*  *incidence* | *2.94* | *3.14* | *3.06* | *3.30* | *3.96* | *3.75* |
| *Sum* | *259* | *276* | *269* | *290* | *349* | *330* |

**SM3**

**Table 3.** Total incidence of microbial species identified at each time point§.

| **Type** | **Bacteria** | **t1** | **t2** | **t3** | **t4** | **t5** | **t6** |
| --- | --- | --- | --- | --- | --- | --- | --- |
| G+ | *Kytococcus sedentarius* | 1 | 0 | 0 | 0 | 0 | 0 |
| G+ | *Microbacterium testaceum* | 0 | 0 | 0 | 1 | 0 | 0 |
| G- | *Acinetobacter baumannii* | 0 | 0 | 0 | 1 | 0 | 0 |
| G- | *Acinetobacter johnsonii* | 1 | 0 | 0 | 0 | 1 | 0 |
| G- | *Acinetobacter lwoffii* | 0 | 2 | 0 | 0 | 0 | 0 |
| G- | *Acinetobacter towneri* | 0 | 0 | 0 | 0 | 1 | 0 |
| G+ | *Actinobaculum massiliense* | 0 | 0 | 0 | 1 | 1 | 0 |
| G+ | *Actinomyces naeslundii* | 0 | 0 | 0 | 0 | 1 | 0 |
| G+ | *Actinomyces oris* | 0 | 0 | 0 | 0 | 1 | 1 |
| G+ | *Actinomyces urogenitalis* | 0 | 0 | 1 | 2 | 1 | 1 |
| G+ | *Actinotignum sanguinis* | 0 | 0 | 0 | 0 | 0 | 1 |
| G+ | *Actinotignum schaalii* | 5 | 2 | 1 | 4 | 4 | 2 |
| G+ | *Aerococcus sanguinicola* | 0 | 0 | 1 | 1 | 1 | 1 |
| G+ | *Aerococcus urinae* | 3 | 2 | 5 | 2 | 3 | 5 |
| G+ | *Aerococcus viridans* | 0 | 1 | 1 | 0 | 2 | 1 |
| G- | *Agrobacterium larrymoorei* | 1 | 0 | 0 | 0 | 0 | 0 |
| G+ | *Alkalihalobacillus clausii* | 0 | 1 | 0 | 0 | 0 | 0 |
| G+ | *Arthrobacter luteolus* | 1 | 0 | 0 | 0 | 0 | 0 |
| G+ | *Bacillus altitudinis* | 0 | 1 | 0 | 0 | 0 | 0 |
| G+ | *Bacillus cereus* | 2 | 0 | 0 | 0 | 0 | 0 |
| G+ | *Bacillus circulans* | 0 | 0 | 1 | 0 | 0 | 0 |
| G+ | *Bacillus endophyticus* | 0 | 0 | 0 | 0 | 0 | 1 |
| G+ | *Bacillus licheniformis* | 0 | 0 | 1 | 1 | 0 | 0 |
| G+ | *Bacillus megaterium* | 0 | 0 | 1 | 0 | 1 | 0 |
| G+ | *Bacillus mycoides* | 0 | 0 | 1 | 0 | 1 | 0 |
| G+ | *Bacillus pumilus* | 0 | 0 | 0 | 1 | 0 | 0 |
| G+ | *Bacillus subtilis* | 0 | 0 | 0 | 0 | 0 | 1 |
| G+ | *Bacillus thuringiensis* | 0 | 0 | 1 | 0 | 0 | 0 |
| G+ | *Bacillus vietnamensis* | 0 | 0 | 0 | 1 | 0 | 0 |
| G+ | *Brachybacterium conglomeratum* | 0 | 1 | 1 | 0 | 0 | 0 |
| G+ | *Brachybacterium paraconglomeratum* | 0 | 0 | 0 | 1 | 0 | 0 |
| G+ | *Brevibacillus brevis* | 0 | 0 | 1 | 0 | 0 | 0 |
| G+ | *Brevibacterium casei* | 0 | 1 | 0 | 1 | 3 | 2 |
| G+ | *Brevibacterium celere* | 1 | 0 | 0 | 1 | 1 | 1 |
| G+ | *Brevibacterium luteolum* | 0 | 0 | 0 | 0 | 0 | 1 |
| G+ | *Brevibacterium mcbrellneri* | 0 | 0 | 0 | 0 | 1 | 0 |
| G+ | *Brevibacillus nitrificans* | 0 | 0 | 0 | 1 | 0 | 0 |
| G+ | *Brevibacterium paucivorans* | 1 | 0 | 0 | 1 | 0 | 0 |
| G+ | *Brevibacterium pityocampae* | 0 | 0 | 0 | 0 | 1 | 0 |
| G+ | *Brevibacterium ravenspurgense* | 0 | 1 | 0 | 1 | 1 | 0 |
| G- | *Brevundimonas diminuta* | 0 | 0 | 0 | 0 | 1 | 0 |
| Y | *Candida albicans* | 1 | 1 | 2 | 1 | 1 | 1 |
| Y | *Candida parapsilosis* | 0 | 0 | 0 | 1 | 0 | 1 |
| G+ | *Cellulosimicrobium cellulans* | 0 | 0 | 0 | 0 | 1 | 0 |
| G- | *Citrobacter freundii* | 0 | 1 | 0 | 0 | 0 | 0 |
| G- | *Citrobacter murliniae* | 0 | 1 | 0 | 0 | 0 | 0 |
| G+ | *Corynebacterium amycolatum* | 1 | 1 | 0 | 1 | 1 | 0 |
| G+ | *Corynebacterium aurimucosum* | 0 | 0 | 0 | 1 | 2 | 1 |
| G+ | *Corynebacterium ciconiae* | 0 | 1 | 0 | 0 | 0 | 0 |
| G+ | *Corynebacterium coyleae* | 1 | 0 | 0 | 0 | 1 | 2 |
| G+ | *Corynebacterium frankenforstense* | 0 | 1 | 0 | 0 | 0 | 0 |
| G+ | *Corynebacterium freneyi* | 0 | 0 | 0 | 0 | 1 | 0 |
| G+ | *Corynebacterium glucuronolyticum* | 2 | 4 | 3 | 3 | 4 | 5 |
| G+ | *Corynebacterium imitans* | 0 | 1 | 0 | 0 | 1 | 1 |
| G+ | *Corynebacterium jeikeium* | 0 | 0 | 0 | 1 | 0 | 0 |
| G+ | *Corynebacterium lipophile* | 1 | 0 | 0 | 1 | 0 | 1 |
| G+ | *Corynebacterium massiliense* | 0 | 1 | 0 | 0 | 0 | 0 |
| G+ | *Corynebacterium minutissimum* | 0 | 1 | 0 | 0 | 0 | 0 |
| G+ | *Corynebacterium mucifaciens* | 0 | 0 | 0 | 0 | 0 | 1 |
| G+ | *Corynebacterium pyruviciproducens* | 1 | 0 | 2 | 0 | 1 | 0 |
| G+ | *Corynebacterium simulans* | 0 | 0 | 0 | 1 | 0 | 1 |
| G+ | *Corynebacterium sp* | 0 | 0 | 1 | 0 | 0 | 0 |
| G+ | *Corynebacterium tuberculostearicum* | 6 | 4 | 7 | 7 | 11 | 7 |
| G+ | *Corynebacterium variabile* | 0 | 0 | 0 | 0 | 0 | 1 |
| G+ | *Corynebacterium xerosis* | 1 | 1 | 0 | 0 | 0 | 0 |
| G+ | *Cutibacterium avidum* | 0 | 0 | 0 | 0 | 1 | 0 |
| G+ | *Dermabacter hominis* | 2 | 2 | 3 | 1 | 4 | 3 |
| G+ | *Dermabacter vaginalis* | 0 | 1 | 0 | 0 | 0 | 0 |
| G+ | *Dermacoccus nishinomiyaensis* | 0 | 0 | 0 | 0 | 1 | 0 |
| G- | *Enterobacter hormaechei* | 0 | 0 | 1 | 0 | 0 | 0 |
| G+ | *Enterococcus avium* | 0 | 0 | 1 | 0 | 0 | 0 |
| G+ | *Enterococcus faecalis* | 25 | 16 | 23 | 23 | 19 | 26 |
| G+ | *Enterococcus faecium* | 0 | 0 | 0 | 1 | 0 | 0 |
| G+ | *Enterococcus gallinarum* | 0 | 0 | 0 | 1 | 0 | 0 |
| G+ | *Enterococcus gilvus* | 0 | 0 | 0 | 1 | 0 | 0 |
| G- | *Escherichia coli* | 4 | 3 | 2 | 3 | 4 | 2 |
| G+ | *Facklamia hominis* | 4 | 4 | 2 | 4 | 4 | 5 |
| G+ | *Gordonia otitidis* | 0 | 0 | 0 | 0 | 0 | 1 |
| G- | *Klebsiella oxytoca* | 0 | 0 | 0 | 0 | 1 | 1 |
| G- | *Klebsiella pneumoniae* | 1 | 0 | 1 | 0 | 1 | 0 |
| G+ | *Kocuria carniphila* | 0 | 0 | 1 | 1 | 0 | 0 |
| G+ | *Kocuria palustris* | 0 | 4 | 2 | 2 | 3 | 4 |
| G+ | *Kocuria rhizophila* | 9 | 14 | 7 | 16 | 20 | 17 |
| G+ | *Kocuria salsicia* | 0 | 0 | 0 | 0 | 1 | 0 |
| G+ | *Lactobacillus gasseri* | 0 | 2 | 3 | 1 | 1 | 2 |
| G+ | *Lysinibacillus sp* | 0 | 1 | 0 | 0 | 0 | 0 |
| G- | *Mannheimia granulomatis* | 0 | 0 | 0 | 0 | 1 | 0 |
| G+ | *Microbacterium aurum* | 0 | 0 | 0 | 0 | 0 | 1 |
| G+ | *Microbacterium keratanolyticum* | 0 | 0 | 0 | 0 | 1 | 0 |
| G+ | *Microbacterium paraoxydans* | 0 | 0 | 0 | 0 | 0 | 1 |
| G+ | *Micrococcus luteus* | 19 | 30 | 28 | 25 | 35 | 21 |
| G+ | *Micrococcus lylae* | 0 | 0 | 0 | 1 | 2 | 0 |
| G+ | *Micrococcus terreus* | 0 | 1 | 0 | 0 | 1 | 0 |
| G- | *Moraxella osloensis* | 7 | 1 | 2 | 2 | 4 | 2 |
| G- | *Moraxella sg Moraxella osolensis* | 0 | 0 | 0 | 0 | 0 | 1 |
| G- | *Morganella morganii* | 0 | 0 | 0 | 0 | 1 | 0 |
| G- | *Neisseria flavescens* | 0 | 0 | 0 | 1 | 0 | 0 |
| G- | *Neisseria subflava* | 0 | 0 | 0 | 0 | 0 | 1 |
| G+ | *Nesterenkonia lacusekhoensis* | 0 | 0 | 0 | 0 | 0 | 1 |
| G+ | *Nosocomiicoccus ampullae* | 0 | 0 | 0 | 0 | 0 | 2 |
| G+ | *Paenibacillus brasilensis* | 1 | 0 | 0 | 0 | 0 | 0 |
| G+ | *Paenibacillus pasadenensis* | 1 | 0 | 0 | 0 | 0 | 0 |
| G+ | *Paenibacillus vulneris* | 0 | 0 | 0 | 0 | 1 | 0 |
| G- | *Paracoccus sp* | 0 | 0 | 1 | 0 | 0 | 0 |
| G+ | *Peribacillus simplex* | 0 | 1 | 0 | 0 | 1 | 0 |
| G- | *Proteus mirabilis* | 0 | 1 | 2 | 2 | 1 | 1 |
| G- | *Providencia rettgeri* | 0 | 0 | 0 | 0 | 0 | 1 |
| G+ | *Pseudoclavibacter alba* | 0 | 0 | 0 | 0 | 1 | 0 |
| G+ | *Pseudoclavibacter faecalis* | 0 | 1 | 0 | 0 | 0 | 0 |
| G+ | *Pseudoglutamicibacter cumminsii* | 0 | 0 | 0 | 0 | 1 | 1 |
| G- | *Pseudomonas luteola* | 0 | 0 | 0 | 1 | 0 | 0 |
| G- | *Pseudomonas monteilii* | 0 | 0 | 0 | 0 | 1 | 0 |
| G- | *Pseudomonas oryzihabitans* | 1 | 1 | 0 | 0 | 1 | 1 |
| G- | *Pseudomonas sp* | 0 | 0 | 0 | 0 | 1 | 0 |
| G- | *Pseudomonas stutzeri* | 0 | 0 | 0 | 0 | 1 | 0 |
| G- | *Roseomonas aestuarii* | 0 | 0 | 0 | 0 | 0 | 1 |
| G- | *Roseomonas mucosa* | 0 | 0 | 0 | 0 | 1 | 0 |
| G+ | *Rothia aeria* | 0 | 1 | 0 | 0 | 1 | 0 |
| G+ | *Rothia amarae* | 2 | 1 | 0 | 0 | 0 | 0 |
| G+ | *Rothia dentocariosa* | 0 | 1 | 1 | 3 | 0 | 0 |
| G+ | *Rothia endophytica* | 0 | 0 | 0 | 0 | 0 | 1 |
| G+ | *Rothia kristinae* | 2 | 3 | 0 | 1 | 1 | 2 |
| G+ | *Rothia mucilaginosa* | 0 | 0 | 1 | 1 | 0 | 0 |
| G+ | *Rothia terrae* | 1 | 3 | 0 | 1 | 1 | 0 |
| G+ | *Schaalia odontolytica* | 0 | 0 | 0 | 1 | 1 | 0 |
| G+ | *Schaalia radingae* | 0 | 0 | 0 | 0 | 1 | 1 |
| G- | *Serratia marcescens* | 0 | 0 | 0 | 0 | 0 | 1 |
| G+ | *Sporosarcina soli* | 0 | 1 | 0 | 0 | 0 | 0 |
| G+ | *Staphylococcus sp* | 0 | 0 | 1 | 0 | 0 | 0 |
| G+ | *Staphylococcus aureus* | 2 | 3 | 2 | 2 | 1 | 4 |
| G+ | *Staphylococcus auricularis* | 0 | 1 | 0 | 0 | 0 | 0 |
| G+ | *Staphylococcus borealis* | 6 | 4 | 6 | 3 | 7 | 6 |
| G+ | *Staphylococcus capitis* | 12 | 12 | 11 | 13 | 21 | 13 |
| G+ | *Staphylococcus caprae* | 0 | 0 | 0 | 0 | 1 | 2 |
| G+ | *Staphylococcus cohnii* | 1 | 5 | 3 | 3 | 0 | 4 |
| G+ | *Staphylococcus condimenti* | 1 | 0 | 0 | 0 | 0 | 0 |
| G+ | *Staphylococcus epidermidis* | 42 | 43 | 37 | 37 | 38 | 53 |
| G+ | *Staphylococcus equorum* | 0 | 0 | 0 | 0 | 2 | 1 |
| G+ | *Staphylococcus haemolyticus* | 24 | 25 | 31 | 27 | 25 | 25 |
| G+ | *Staphylococcus hominis* | 28 | 27 | 31 | 32 | 34 | 32 |
| G+ | *Staphylococcus lugdunensis* | 10 | 12 | 6 | 8 | 13 | 6 |
| G+ | *Staphylococcus nepalensis* | 0 | 0 | 0 | 1 | 0 | 0 |
| G+ | *Staphylococcus pasteuri* | 1 | 2 | 3 | 5 | 6 | 5 |
| G+ | *Staphylococcus petrasii* | 4 | 2 | 2 | 1 | 3 | 3 |
| G+ | *Staphylococcus pettenkoferi* | 1 | 1 | 2 | 2 | 1 | 2 |
| G+ | *Staphylococcus saprophyticus* | 5 | 0 | 3 | 2 | 5 | 6 |
| G+ | *Staphylococcus simulans* | 1 | 1 | 0 | 1 | 2 | 2 |
| G+ | *Staphylococcus sciuri* | 0 | 0 | 0 | 0 | 1 | 1 |
| G+ | *Staphylococcus succinus* | 0 | 0 | 0 | 0 | 0 | 1 |
| G+ | *Staphylococcus vitulinus* | 0 | 0 | 0 | 0 | 0 | 1 |
| G+ | *Staphylococcus xylosus* | 0 | 0 | 0 | 0 | 0 | 1 |
| G+ | *Staphylococcus warneri* | 7 | 6 | 10 | 12 | 7 | 8 |
| G- | *Stenotrophomonas maltophilia* | 1 | 0 | 0 | 0 | 0 | 0 |
| G- | *Stenotrophomonas nitritireducens* | 0 | 0 | 0 | 0 | 1 | 0 |
| G+ | *Streptococcus agalactiae* | 1 | 0 | 0 | 1 | 1 | 2 |
| G+ | *Streptococcus anginosus* | 0 | 1 | 2 | 0 | 3 | 2 |
| G+ | *Streptococcus constellatus* | 0 | 1 | 0 | 0 | 1 | 0 |
| G+ | *Streptococcus infantis* | 0 | 0 | 0 | 0 | 1 | 0 |
| G+ | *Streptococcus mitis* | 0 | 0 | 0 | 2 | 1 | 2 |
| G+ | *Streptococcus oralis* | 1 | 0 | 1 | 0 | 0 | 0 |
| G+ | *Streptococcus parasanguinis* | 0 | 0 | 1 | 1 | 0 | 0 |
| G+ | *Streptococcus pneumoniae* | 1 | 0 | 0 | 0 | 0 | 0 |
| G+ | *Streptococcus salivarius* | 0 | 0 | 0 | 2 | 1 | 0 |
| G+ | *Streptococcus sanguinis* | 0 | 0 | 2 | 1 | 1 | 1 |
| G+ | *Streptococcus urinalis* | 0 | 2 | 0 | 0 | 0 | 2 |
| G+ | *Streptococcus vestibularis* | 0 | 1 | 0 | 0 | 0 | 0 |
| G+ | *Winkia neuii* | 1 | 4 | 3 | 3 | 2 | 4 |

**SM4**

**Table 4.** Significant correlations (Spearman method, p<0.05) between total genera incidence and passed time (t1 to t6)§.

|  | ***Microbacterium*** | ***Actinomyces*** | ***Corynebacterium*** | ***Pseudoglutamicibacter*** | ***Roseomonas*** | ***Staphylococcus*** | ***Streptococcus*** |
| --- | --- | --- | --- | --- | --- | --- | --- |
| ***Correlation coefficient (rho)*** | 0.92 | 0.88 | 0.82 | 0.83 | 0.83 | 0.90 | 0.98 |
| ***p*** | *0.008* | *0.019* | *0.045* | *0.042* | *0.042* | *0.014* | *0.0006* |

**SM5**

**Table 5.** Table showing variables displaying significant mean change in relation to the first time point (t1)§, based on ANOVA-Tukey HSD analysis; n.s. = non-significant (p adj.>0.05), *p adj.<0.05, **p adj.<0.001, ***p adj.<0.0001. Cell colors encode mean values (red = higher, blue = lower; color intensity reflects value magnitude).

|  |  | **Time point** | | | | | |  |
| --- | --- | --- | --- | --- | --- | --- | --- | --- |
|  |  | **t1** | **t2** | **t3** | **t4** | **t5** | **t6** |  |
| **#lym-b** |  |  | n.s. | *** | *** | *** | * |  |
| **#neut-b** |  |  | n.s. | n.s. | ** | ** | * |  |
| **AST-b** |  |  | n.s. | * | n.s. | n.s. | n.s. |  |
| **HGB-b** |  |  | n.s. | * | ** | * | * |  |
| **NLR-b** |  |  | n.s. | *** | * | n.s. | n.s. |  |
| **RBC-b** |  |  | n.s. | * | ** | * | * |  |
| **TNI** |  |  | n.s. | n.s. | n.s. | * | * |  |
| **tPSA-b** |  |  | n.s. | n.s. | *** | *** | *** |  |
| **WBC-b** |  |  | n.s. | ** | *** | *** | * |  |
|  |  |  |  |  |  |  |  |  |

**Notes:**

§ t1 - before gold fiducial implantation into the prostate gland; t2 - before radiotherapy; t3 - at the end of radiotherapy; t4 - 1 month after radiotherapy; t5 - 4 months after radiotherapy; t6 - 7 months after radiotherapy.

-l – in blood, - u – in urine, #lym – lymphocytes count, #neut – neutrophiles count, AST– aspartate aminotransferase, HGB – hemoglobin level, NLR - neutrophil-to-lymphocyte ratio, RBC– erythrocytes level, TNI – total number of isolates, tPSA– prostate cancer specific antigen level, WBC – leukocytes level.
